# Supplementary material
Source: publisher figshare collection journal article supplement (https://tandf.figshare.com/articles/dataset/_/8874380)
Supplement: Supplementary file 2 [file 1]

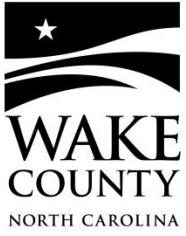

Wake County Co-Location Shelter  
Animal Information Sheet

Animal Owner/Agent Name \_\_\_\_\_

Date \_\_\_\_\_ Contact number (in shelter) \_\_\_\_\_

| Name | Microchip # | Color | Sex | Breed | Age |
|------|-------------|-------|-----|-------|-----|
|      |             |       |     |       |     |
|      |             |       |     |       |     |
|      |             |       |     |       |     |
|      |             |       |     |       |     |

**(If the owner has more than four animals, please use an additional sheet with all areas completely filled out)**

---

**SIGNATURE BELOW INDICATES THAT THE OWNER OR GUARDIAN HAS CLEANED THEIR PET CAGE(S), RECEIVED THEIR PET(S), THEIR BELONGINGS AND IS CHECKING OUT OF THE SHELTER.**

OWNER/AGENT SIGNATURE \_\_\_\_\_

DATE AND TIME CHECKED OUT \_\_\_\_\_

STAFF NAME \_\_\_\_\_ STAFF INITIALS \_\_\_\_\_
