# Supplementary material
Source: publisher figshare collection journal article supplement (https://tandf.figshare.com/articles/dataset/_/8874380)
Supplement: Supplementary file 3 [file 1]

Archive with 4 entries (4 files):
- Appendix A - WC Animal Protection Plan.pdf
- Appendix B - WC Evacuation Shelter Pet Section SOP.pdf
- Appendix C - Wake County Co-Location Shelter Animal Information.pdf
- Appendix D - Wake County Co-Location Shelter Agreement.pdf
